# Supplementary material for: Altered proteolytic events in experimental autoimmune encephalomyelitis discovered by iTRAQ shotgun proteomics analysis of spinal cord
Source: PubMed Central journal article supplement (PMC2716311; doi:10.1186/1477-5956-7-25), 2009-07-16

Peptide sequence: **LWLDSGSEPELR**

Precursor Mass: 1545.743

Protein:  **$\alpha_1$ B-glycoprotein**

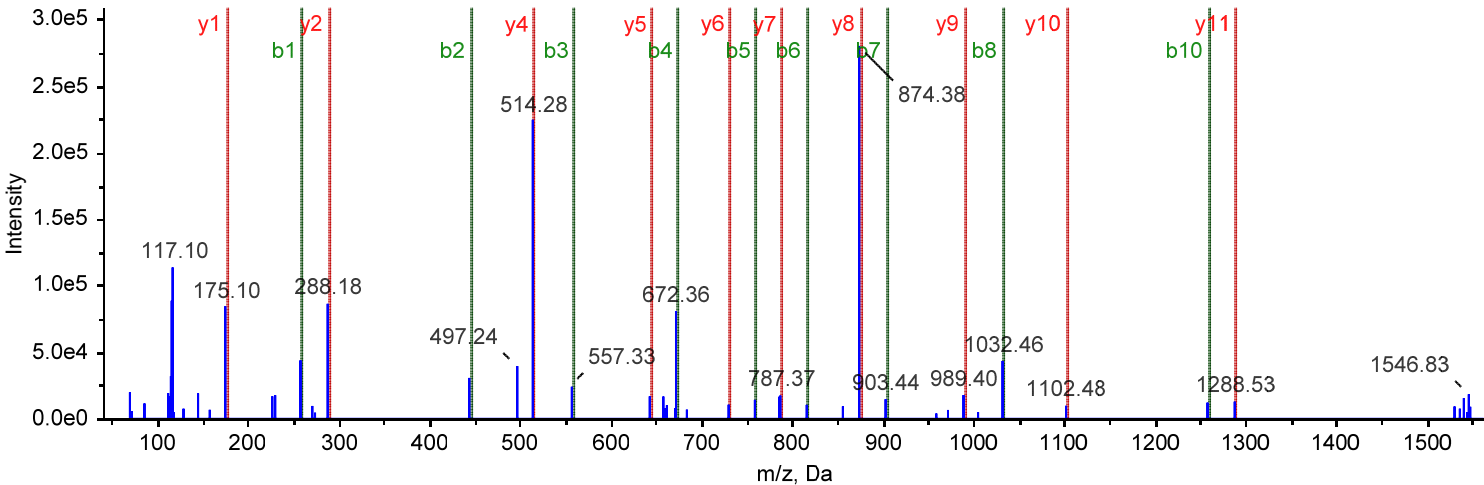

Peptide sequence: **FLELTLPYSVVR**

Precursor Mass: 1580.917

Protein:  $\alpha_1$ -Macroglobulin

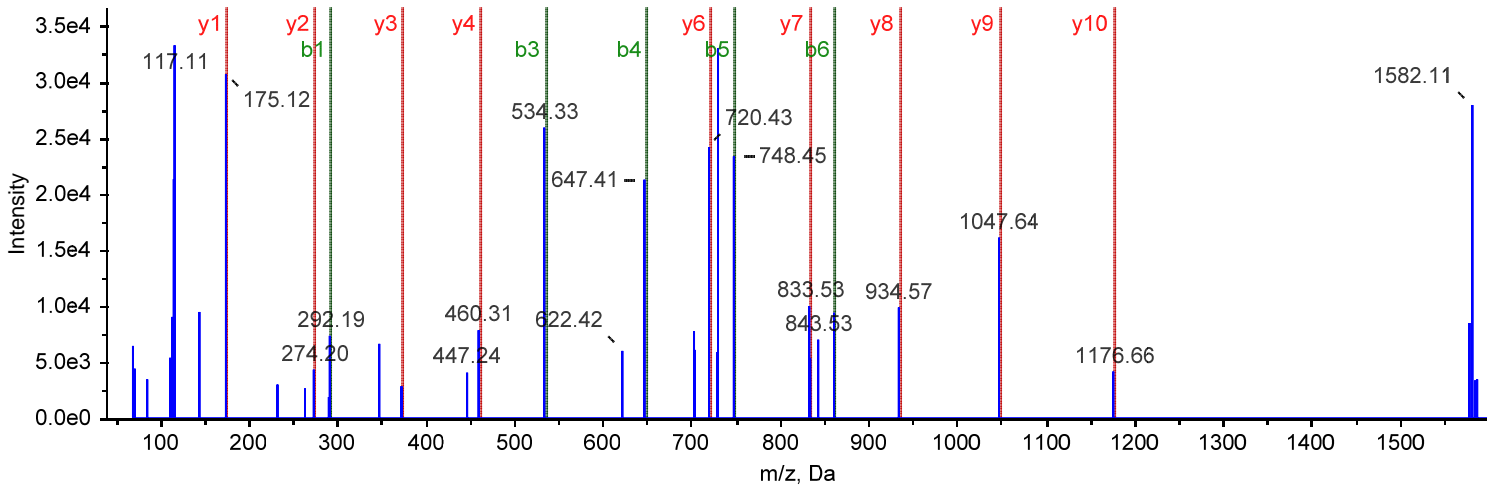

Peptide sequence: **ILAHTEFTPETDVYACR**

Precursor Mass: 2257.067

Protein:  $\beta_2$ -Microglobulin

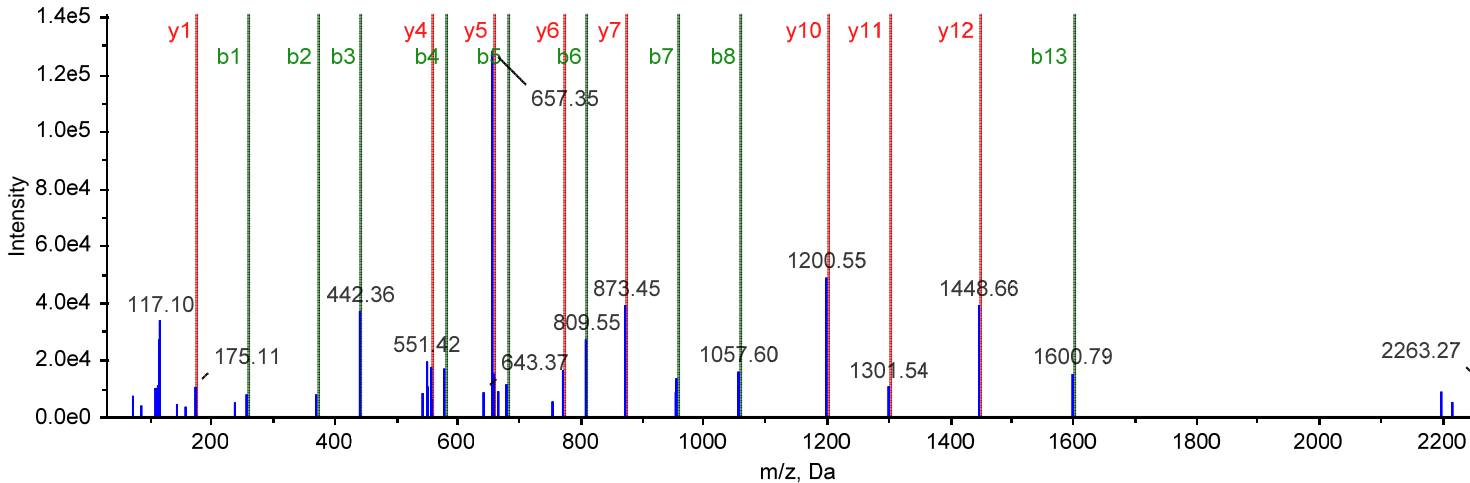

Peptide sequence: **YTSHVQEEQSEVEETIEATK**

Precursor Mass: 2625.292

Protein: **Neurofilament light polypeptide**

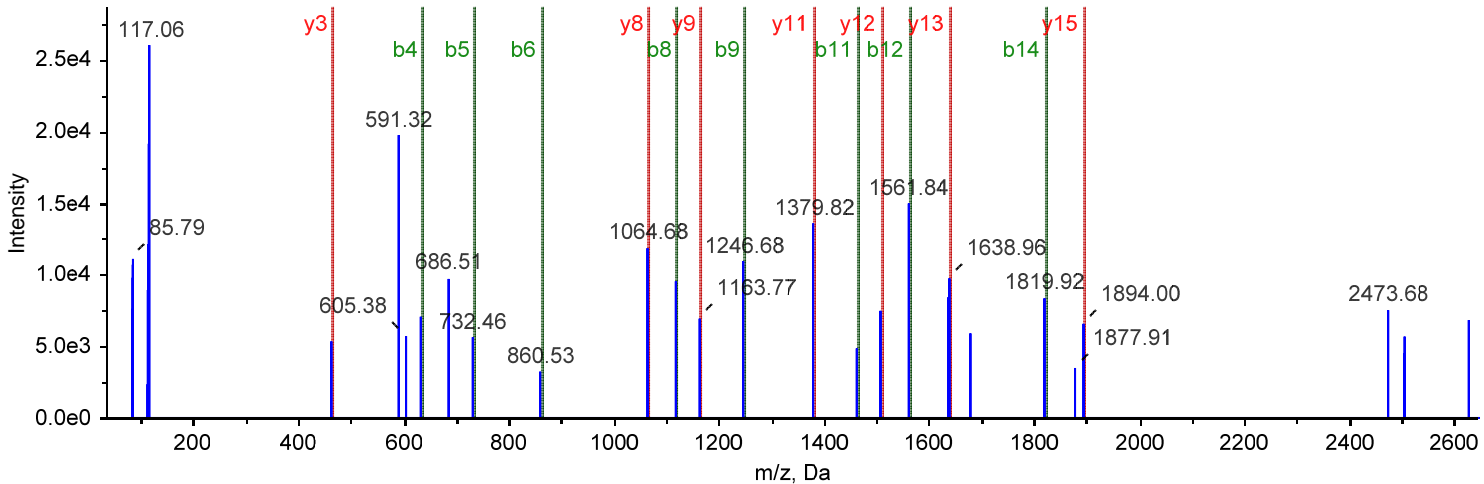

Peptide sequence: **TVEIVDSVEAYATMLR**

Precursor Mass: 1941.006

Protein: **Phosphoglucomutase-1**

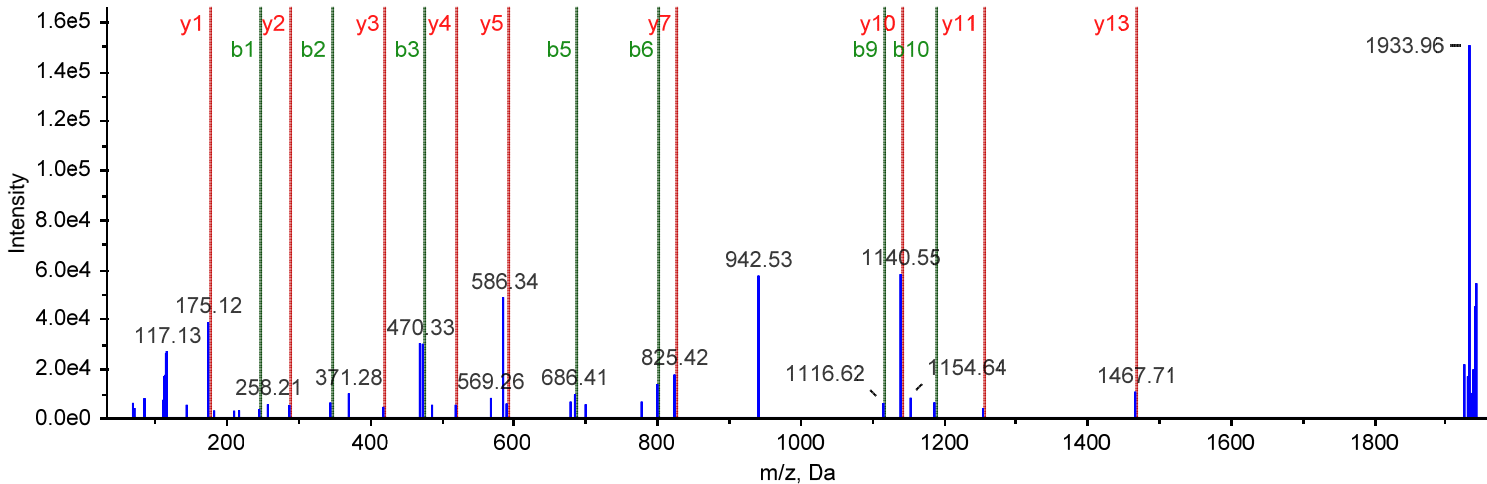

Peptide sequence: **EDVCQDCMK**

Precursor Mass: 1450.59

Protein: **Sulfated glycoprotein 1**

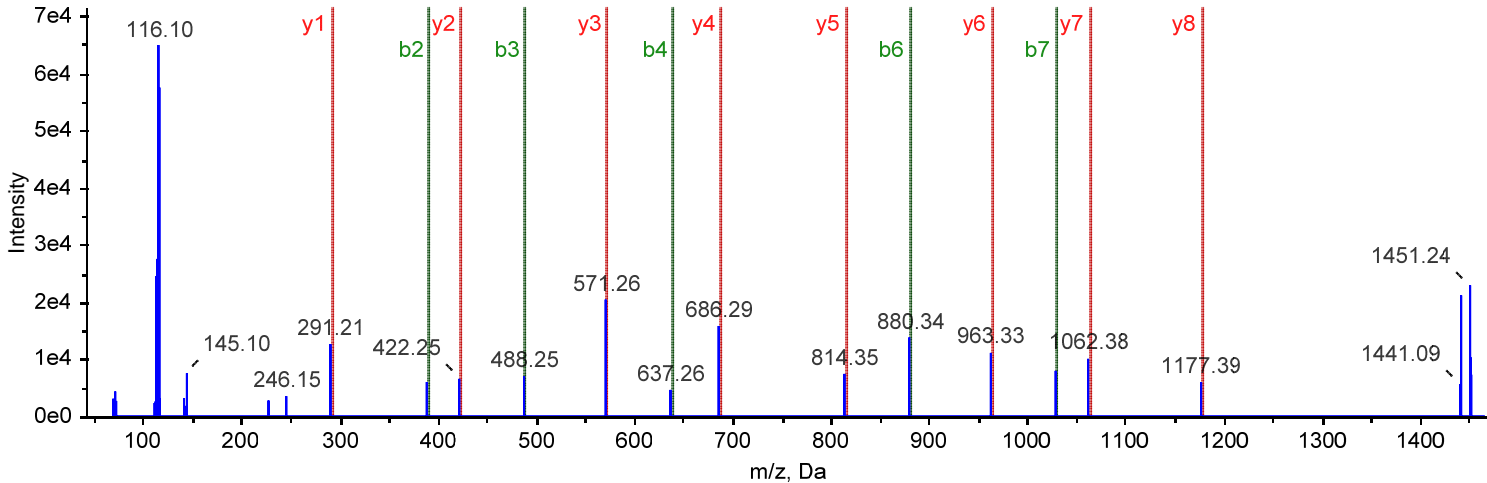

Peptide sequence: **GFCEVCK**  
Precursor Mass: 1165.489  
Protein: **Sulfated glycoprotein 1**

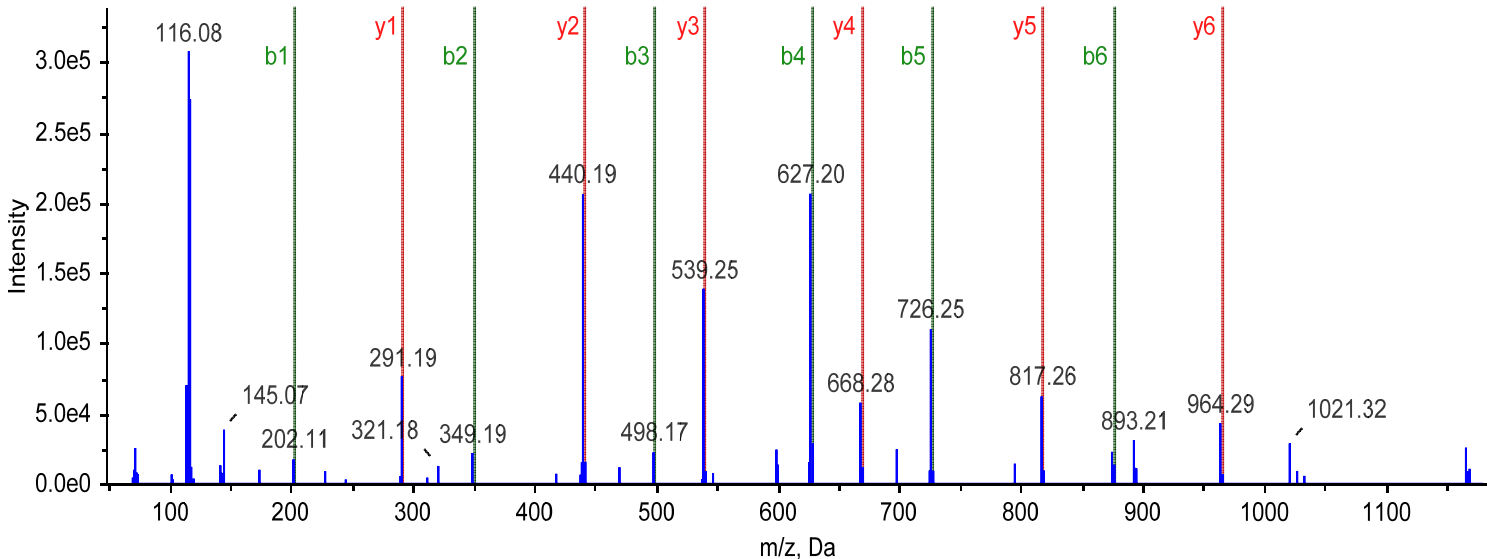

Supplement: 1477-5956-7-25-S3.pdf [file 1477-5956-7-25-S3.pdf]
