# Supplementary material for: Altered proteolytic events in experimental autoimmune encephalomyelitis discovered by iTRAQ shotgun proteomics analysis of spinal cord
Source: PubMed Central journal article supplement (PMC2716311; doi:10.1186/1477-5956-7-25), 2009-07-16
Supplement: 1477-5956-7-25-S4.pdf [file 1477-5956-7-25-S4.pdf]

sp|Q63041|A1M\_RAT MRRNQQLP---IPVFLLLLLLLLLPRDATAATGKPRYVVLVPSSELYAGVPEKVCVHLNHLNE 56  
sp|P06238|A2MG\_RAT MGKHLRLSLALLPLLRLLLLLLPTDASAPQKPIYMVMVPSLLHAGTPEKACFLFSHLNE 60  
\* : : : \* : : \* \* \* \* \* : : \* \* \* \* : \* \* \* \* \* : \* \* \* \* \* : \* \* \* \* \*  
sp|Q63041|A1M\_RAT TVTLNVTLEYGVQYSNLLIDQAVDKDSSYCSFSFTISRPLS-PSALIAVEIKGPTHFFIKK 115  
sp|P06238|A2MG\_RAT TVAVRVSLBSVRGNQSLFTDLVVDKDLFCHCTSTVPQSSSDEVMFPTVQVKGATHEFRRR 120  
\* \* : : \* \* \* \* : : \* \* \* \* \* : \* \* \* \* \* : \* \* \* \* \* : \* \* \* \* \* : \* \* \* \* \*  
sp|Q63041|A1M\_RAT KSMWITKAESPVVFQTDKPIYKPGQTVKFRVVSVDISFRPVNETFPVVYIENPKNRIFQ 175  
sp|P06238|A2MG\_RAT STVLVKKKESLVAFAQTDKPIYKPGQTVRFRVVSLESHPLNELILPLLQDPKNNRIAQ 180  
: : : \* \* \* \* \* : \* \* \* \* \* : \* \* \* \* \* : \* \* \* \* \* : \* \* \* \* \* : \* \* \* \* \*  
sp|Q63041|A1M\_RAT WQNVLDLPGHLQLSFPLSVEPALGIYKVVQKDSGKKIEHSFEVKEYVLPKFEVQVKMPK 235  
sp|P06238|A2MG\_RAT WQNFNLEGLKQLSFLSSEPTQGSYKVVIRTESGRTEVHPFSVEBFVLPKFEVVRTVE 240  
\* \* \* : \* \* \* \* \* \* \* \* \* \* \* : \* \* \* \* \* : \* \* \* \* \* : \* \* \* \* \* : \* \* \* \* \*  
sp|Q63041|A1M\_RAT TMAFLEEBLVVTCAGLYTYGKVPVGLVMTMKVCRKYTQSYSNCHGQHSKSICEEFSKQADE 295  
sp|P06238|A2MG\_RAT TITILEEEMNVSVCGIYTYGKVPVGRVTVNICRKYSNP-SNCFGEBSVAFCEKLSQQLD 299  
\* : : \* \* \* \* \* : \* \* \* \* \* \* \* \* \* \* \* : \* \* \* \* \* : \* \* \* \* \* : \* \* \* \* \*  
sp|Q63041|A1M\_RAT KGCFRQVVVKTKVFPQRQKGYDMKIEVEAKIKEDGTGIELTGTGSCEIANTLSKLFKTKAN 355  
sp|P06238|A2MG\_RAT RGCFSQLVKTKSPQLKRQYEQMLDVHAKIQEBGTGVETGKGLTKITRTITKLSFVNVD 359  
: \* \* \* \* \* \* \* \* \* \* : : \* \* \* \* \* : \* \* \* \* \* : \* \* \* \* \* : \* \* \* \* \* : :  
sp|Q63041|A1M\_RAT TFRYRPLPFFGQVLLVDEKGGQIPNKNLTVQVNSVRSQFTFTTDEHGLANILIDTNTFTF 415  
sp|P06238|A2MG\_RAT SHFRQGIPIVFGQVLLVDGRGTPPIYETIFIGADEANLYINTTDDKHLARFSINTDDIMG 419  
: \* \* \* \* \* \* \* \* \* \* : \* \* \* \* \* : \* \* \* \* \* : \* \* \* \* \* : \* \* \* \* \* : \*  
sp|Q63041|A1M\_RAT SFMGIRVLYKQNNICFDNWWVDEYHTQADHSAARIFSPRSYIQLELVLTGTLACGQTEI 475  
sp|P06238|A2MG\_RAT TSLTVRAKYKDSNACYGRFWLTEENVEAWHTAYAVFSPRSFLHLSLDPDKLRCDQTEV 479  
: : \* \* \* \* \* \* \* \* \* \* : \* \* \* \* \* : \* \* \* \* \* : \* \* \* \* \* : \* \* \* \* \* :  
sp|Q63041|A1M\_RAT RIHFLLEDALDKADKDLTFYYLTKARGSIFNSGSHVLPLEQQKVKGVVSPFIRVPEGMAP 535  
sp|P06238|A2MG\_RAT QAHYILNNGEAMQELKELVFFYYLMMAKGIVRAGTHVLPKQQQMRGHFSILISMETDLAP 539  
: \* \* \* \* \* \* \* \* \* \* : \* \* \* \* \* : \* \* \* \* \* : \* \* \* \* \* : \* \* \* \* \* : \*  
sp|Q63041|A1M\_RAT VAKLIVYTIPLNEELIADVQKFDIEKCFANTVNLSPSAQSLPASPDTHLTVKATPLSLCA 595  
sp|P06238|A2MG\_RAT VARLVLYAILPNGEVVDGTAKEYEINCLANKVDLVFRPNSGLPATRALLSVMASPSQLCG 599  
\* \* \* : \* \* \* \* \* : : \* \* \* \* \* : \* \* \* \* \* : \* \* \* \* \* : \* \* \* \* \* : \* \* \* \* \*  
sp|Q63041|A1M\_RAT LTAVDQSVLLKPEAKLSPQSIYNLLPQKAEQGYALGPLPYKGGEN-CIKAEEDITHNGIV 654  
sp|P06238|A2MG\_RAT LRAVDQSVLLMKPETELASLIYDLPVKDLTGFPQGDQRREDTNGCVKQNDTYINGLIL 659  
\* \* \* \* \* \* \* \* \* \* : \* \* \* \* \* : \* \* \* \* \* : \* \* \* \* \* : \* \* \* \* \* : \* \* \* \* \*  
sp|Q63041|A1M\_RAT YTPKQDLNDNDAYSVFQSIGLKIFTNTRVHKPRYCPMYQAYPPLVYVGEPAQALAMSAIPG 714  
sp|P06238|A2MG\_RAT YSPVQNTNEEDMYGFLDKMGLKVFNTSNIRKPKVCERLRD-----KGIPA 705  
\* \* \* : \* \* \* \* \* : : \* \* \* \* \* : \* \* \* \* \* : \* \* \* \* \* : \* \* \* \* \* : \* \* \* \* \*  
sp|Q63041|A1M\_RAT AGYRSSNIRTSMMMMGASEVAQEVEVRETVRKYFPEWTIWMVPLDLSGDGELPVKVPD 774  
sp|P06238|A2MG\_RAT AYHLVQSQSHMDAFLESSEPT-----ETRRSYFPEWTIWDLVVDSAGVAEVEVTVPD 758  
\* : : \* \* \* \* \* : : : \* \* \* \* \* : \* \* \* \* \* : \* \* \* \* \* : \* \* \* \* \* : \* \* \* \* \*  
sp|Q63041|A1M\_RAT TITEWKASAFCLSGTGLGLSSTISHKVFQPFLELTLPYSVVRGEAFILKATVLNLYMPH 834  
sp|P06238|A2MG\_RAT TITEWKAGAFCLSNDTGLGLSPVQFQAFQPFVVELTMPYSVIRGEAFTLKATVLNLYLPT 818  
\* \* \* \* \* \* \* \* \* \* : \* \* \* \* \* : \* \* \* \* \* : \* \* \* \* \* : \* \* \* \* \* : \* \* \* \* \*  
sp|Q63041|A1M\_RAT CIRIHVSLEMSPDFLAVPVGSHEDSHCICGNERKTVSWAVTPKSLGEVNFATAEALQSP 894  
sp|P06238|A2MG\_RAT CIRVAVQLEASPDFLAAPEEKRQRSHCICMNRHTASWAVIPKSLGNVNFVSAEALNSK 878  
\* \* \* : \* \* \* \* \* \* \* \* \* \* : \* \* \* \* \* : \* \* \* \* \* : \* \* \* \* \* : \* \* \* \* \* : \* \* \* \* \*  
sp|Q63041|A1M\_RAT ELCNGKVAEVPALVQKDTVVKPVIVPEPEGIEKEQTYNTLLCPQDAELQENWTLDPANVV 954  
sp|P06238|A2MG\_RAT ELCNGEVVVPPEQGKDKTIKSLLVEPEGLNEVTFNSLLCPMAEAVSELIALKLPDVV 938  
\* \* \* \* \* : \* \* \* \* \* : \* \* \* \* \* : \* \* \* \* \* : \* \* \* \* \* : \* \* \* \* \* : \* \* \* \* \*  
sp|Q63041|A1M\_RAT EGSARATQSVLGDILGSAMQNLQNLQMPYGCGEQNMVLFVFNIIYVLEYLNETQQLTEAI 1014  
sp|P06238|A2MG\_RAT EESARASVTVLGDILGSAMQNTQDLKMPYGCGEQNMVLFAPNIYVLDYLNQQLTQTEI 998  
\* \* \* \* \* : \* \* \* \* \* \* \* \* \* \* : \* \* \* \* \* : \* \* \* \* \* : \* \* \* \* \* : \* \* \* \* \* : \* \* \* \* \*  
sp|Q63041|A1M\_RAT KSKAISYLSGYQRQLNYQHSYDGSYSTFGDRGMRHSQNTWLTAFVLKAFQAQSYIYE 1074  
sp|P06238|A2MG\_RAT KTKAIAYLNTGYQRQLNYKHRDGSYSTFGDKPGRN-HANTWLTAFVLSFAQARKYIFID 1057  
\* \* \* \* \* : \* \* \* \* \* \* \* \* \* \* : \* \* \* \* \* : \* \* \* \* \* : \* \* \* \* \* : \* \* \* \* \* : \* \* \* \* \*  
sp|Q63041|A1M\_RAT KTHITNAPNWLMSKQRENGCFQQSGSLLNNAKGGVDEVTLSAYITIALLEMLPVTHS 1134  
sp|P06238|A2MG\_RAT BVHITQALLWLSQQKDNCGCFRSGSLLNNAKGGVDEVTLSAYITIALLEMSLPVTHP 1117  
: \* \* \* \* \* : \* \* \* \* \* : : \* \* \* \* \* : \* \* \* \* \* : \* \* \* \* \* : \* \* \* \* \* : \* \* \* \* \*  
sp|Q63041|A1M\_RAT VVRNALFCLLETAWASISN-SQESHVYTKALLAYAFALAGNRAKRSEVLESLNKDAVNEE 1193  
sp|P06238|A2MG\_RAT VVRNALFCLDTAWKARSARGAGGSHVYTKALLAYAFALAGNQDTKKEILKSLDEBAVKEED 1177  
\* \* \* \* \* : \* \* \* \* \* \* \* \* \* \* : \* \* \* \* \* : \* \* \* \* \* : \* \* \* \* \* : \* \* \* \* \* : \* \* \* \* \*  
sp|Q63041|A1M\_RAT SVHWQRPKNVEENVREMRSFYSYKPRAPSAEVEMTAYVLLAYLTSASSRPTRDLSDDLTT 1253  
sp|P06238|A2MG\_RAT SVHWTRPQKPSVSV---ALWYQPQAPSAEVEMTAYVLLAYLTPTEPAP---TQEDLTA 1228  
\* \* \* \* \* : \* \* \* \* \* : : \* \* \* \* \* : \* \* \* \* \* : \* \* \* \* \* : \* \* \* \* \* : \* \* \* \* \*  
sp|Q63041|A1M\_RAT ASKIVKWIISKQNSHGGFSSSTQDVTVALQALSXYGAATFTKSNKEVSVTIESSGTVSGLT 1313  
sp|P06238|A2MG\_RAT AMLIVKWLTKQNSHGGFSSSTQDVTVALHALSXYGSAATFTTRAKKAAQVTHSSGTFSTKF 1288  
\* \* \* \* \* : \* \* \* \* \* \* \* \* \* \* : \* \* \* \* \* : \* \* \* \* \* : \* \* \* \* \* : \* \* \* \* \* : \* \* \* \* \*  
sp|Q63041|A1M\_RAT HVNNGNRLLLQEVRLADLPNGYITKVSQSGCVYLQTSLKYNILPEAGEAPFTLKVNTLP 1373  
sp|P06238|A2MG\_RAT QVNNNNQLLLQVRLTPVPGDYTVKVTGEGCVYLQTSLKYSVLPREE-EFPFTVVVQTLTP 1347  
: \* \* \* \* \* : \* \* \* \* \* : \* \* \* \* \* : \* \* \* \* \* : \* \* \* \* \* : \* \* \* \* \* : \* \* \* \* \*  
sp|Q63041|A1M\_RAT LNFDKAEHHRKFIHINVSYIGERPNSNMVIVDKVMVSGFIPVKPSVKKLQDQSNIQRT 1433  
sp|P06238|A2MG\_RAT GTCEDPKAHTSFQIISLNIYSYTGSRSESNMAIADVVMVSGFIPKPTVKMLERSVHVSRT 1407  
: : : \* \* \* \* \* : \* \* \* \* \* : \* \* \* \* \* : \* \* \* \* \* : \* \* \* \* \* : \* \* \* \* \*  
sp|Q63041|A1M\_RAT VNTNHWLIYIEKLTNQTMGFSFAVEQDIPVKNLKPAPVKVYDYETEFAIEEYSAPFSS 1493  
sp|P06238|A2MG\_RAT VSNNHVLIYLDKVSNTVNLSTVQQDIPIRDLPKAVVKVYDYEKDEFVAVKYSAPCST 1467  
\* . \* \* \* \* \* : \* \* \* \* \* : \* \* \* \* \* : \* \* \* \* \* : \* \* \* \* \* : \* \* \* \* \* : \* \* \* \* \*  
sp|Q63041|A1M\_RAT DSEQGNA 1500  
sp|P06238|A2MG\_RAT D--YDNA 1472  
\* \* \* \* \*
